# Supplementary material
Source: ML conference proceedings conference paper supplement (https://proceedings.neurips.cc/paper_files/paper/2018/hash/a0160709701140704575d499c997b6ca-Abstract.html)
Supplement: Supplementary file [file a0160709701140704575d499c997b6ca-Supplemental.zip]

# Norm matters: supplementary material

## 1 Implementation Details for weight-decay experiments

For all experiments, we used weight decay on the last layer with  $\lambda = 0.0005$ . The network architecture was VGG11 [4] with batch-norm after every convolution layer. Learning rate started from 0.1 and divided by 10 every 20 epochs (except for the norm scheduling experiment). The same random seed was used.

## 2 Importance of normalization constants

Figure 1 shows the scale adjustment  $C_{L_1}$  is essential even for relatively "easy" data sets with small images such as CIFAR-10, and the use of smaller/bigger adjustments degrade classification accuracy.

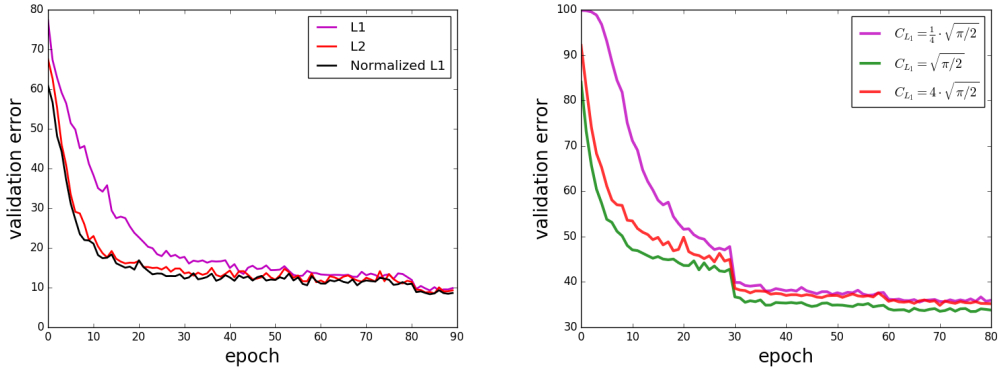

Figure 1: *Left*: The importance of normalization term  $C_{L_1}$  while training ResNet-56 on CIFAR-10. Without the use of  $C_{L_1}$  the network convergence is slower and reaches a higher final validation error. We found it somewhat surprising that a constant so close to one ( $C_{L_1} = \sqrt{\pi/2} \approx 1.25$ ) can have such an impact on performance. *Right*: We further demonstrate, with Res18 on ImageNet, that  $C_{L_1} = \sqrt{\pi/2}$  is optimal: performance is only degraded if we modify  $C_{L_1}$  to other nearby values.

### 2.1 Deriving $C_{L_\infty}$

As seen in main manuscript,

$$\hat{x}^{(k)} = \frac{x^{(k)} - \mu^k}{C_{L_\infty}(n) \cdot \|x^{(k)} - \mu^k\|_\infty}, \quad (1)$$

To derive  $C_{L_\infty}(n)$  we assume again the input  $\{x_i\}_{i=1}^n$  to the normalization layer follows a Gaussian distribution  $N(\mu^k, \sigma^2)$ . Then, the maximum absolute deviation is bounded on expectation as follows

[3]:

$$\frac{\sigma \cdot \sqrt{\ln(n)}}{\sqrt{\pi \ln(2)}} \leq \|x^{(k)} - \mu^k\|_\infty \leq \sigma \sqrt{2 \ln(n)}.$$

Therefore, by multiplying the three sides of inequality with the normalization term  $C_{L^\infty}(n)$ , the  $L^\infty$  batch norm in equation 1 approximates an expectation the original standard deviation measure  $\sigma$  as follows:

$$l \leq C_{L^\infty}(n) \cdot \|x^{(k)} - \mu^k\|_\infty \leq u$$

where  $l = \frac{1 + \sqrt{\pi \ln(4)}}{\sqrt{8\pi \ln(2)}} \cdot \sigma \approx 0.793\sigma$ , and  $u = \frac{1 + \sqrt{\pi \ln(4)}}{2} \cdot \sigma \approx 1.543\sigma$ .

### 3 Bounded-weight-norm experiments

Figure 2 depicts the impact of bounded-weight norm for the training of recurrent network on WMT14 de-en task. Additional results are summarized in Table 1.

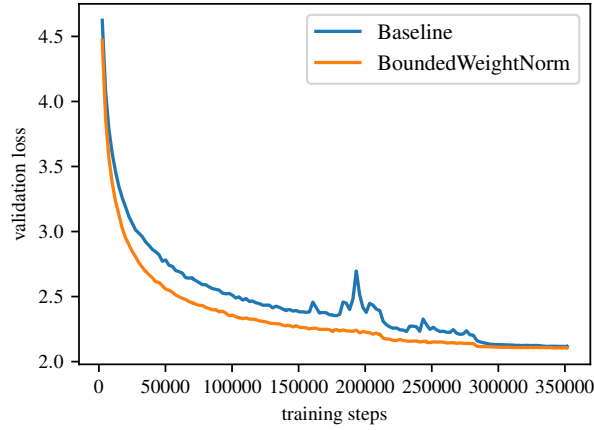

Figure 2: Comparison between bounded weight-norm and baseline with no normalization in recurrent network training (LSTM attention-seq2seq network, WMT14 de-en)

Table 1: Results comparing baseline,  $L^2$  based normalization with weight-norm (WN) by Salimans & Kingma [2] and our bounded-weight-norm (BWN)

| Network              | Batch/Layer norm | WN      | BWN       |
|----------------------|------------------|---------|-----------|
| ResNet56 (Cifar10)   | 93.03%           | 92.5%   | 92.88%    |
| ResNet50 (ImageNet)  | 75.3%            | 67% [1] | 73.8%     |
| Transformer (WMT14)  | 27.3 BLEU        | -       | 26.5 BLEU |
| 2-layer LSTM (WMT14) | 21.5 BLEU        | -       | 21.2 BLEU |

Table 2: Results comparing baseline, and  $L^1$  norm results (ppl for perplexity)

| Network             | $L^2$ Batch/Layer norm | $L^1$ Batch/Layer norm |
|---------------------|------------------------|------------------------|
| ResNet56 (Cifar10)  | 93.03%                 | 93.07%                 |
| ResNet18 (ImageNet) | 69.8%                  | 69.74%                 |
| ResNet50 (ImageNet) | 75.3%                  | 75.32%                 |
| Transformer (WMT14) | 5.1 ppl                | 5.2 ppl                |

## References

- [1] Gitman, I. and Ginsburg, B. Comparison of batch normalization and weight normalization algorithms for the large-scale image classification. *CoRR*, abs/1709.08145, 2017.
- [2] Salimans, T. and Kingma, D. P. Weight normalization: A simple reparameterization to accelerate training of deep neural networks. In *Advances in Neural Information Processing Systems*, pp. 901–909, 2016.
- [3] Simon, M. K. Probability distributions involving gaussian random variables: A handbook for engineers and scientists. 2007.
- [4] Simonyan, K. and Zisserman, A. Very deep convolutional networks for large-scale image recognition. *arXiv preprint arXiv:1409.1556*, 2014.
